# Supplementary material for: Differential susceptibility of Onchocerca volvulus microfilaria to ivermectin in two areas of contrasting history of mass drug administration in Cameroon: relevance of microscopy and molecular techniques for the monitoring of skin microfilarial repopulation within six months of direct observed treatment
Source: Springer Nature journal article supplement (doi:10.1186/s12879-020-05444-2), 2020-10-02

**A**

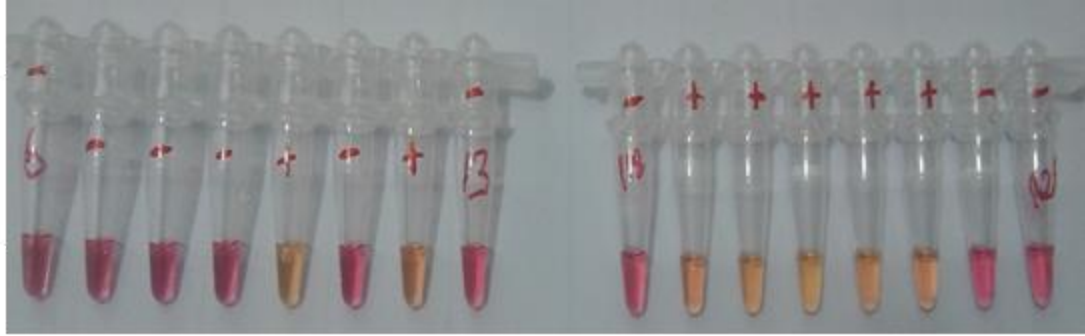

**B**

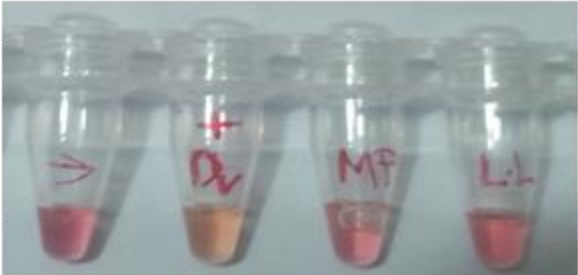

Supplement: MOESM4 [file 18442242]
